# Supplementary material for: Molecular Basis of the Anticancer and Antibacterial Properties of CecropinXJ Peptide: An In Silico Study
Source: MDPI journal article supplement (doi:10.3390/ijms22020691), 2021-01-12
Supplement: s1 [file s1]

Supplementary Materials

# **Molecular basis of the anticancer and antibacterial properties of CecropinXJ peptide: An In Silico Study**

Francisco Ramos-Martín and Nicola D'Amelio

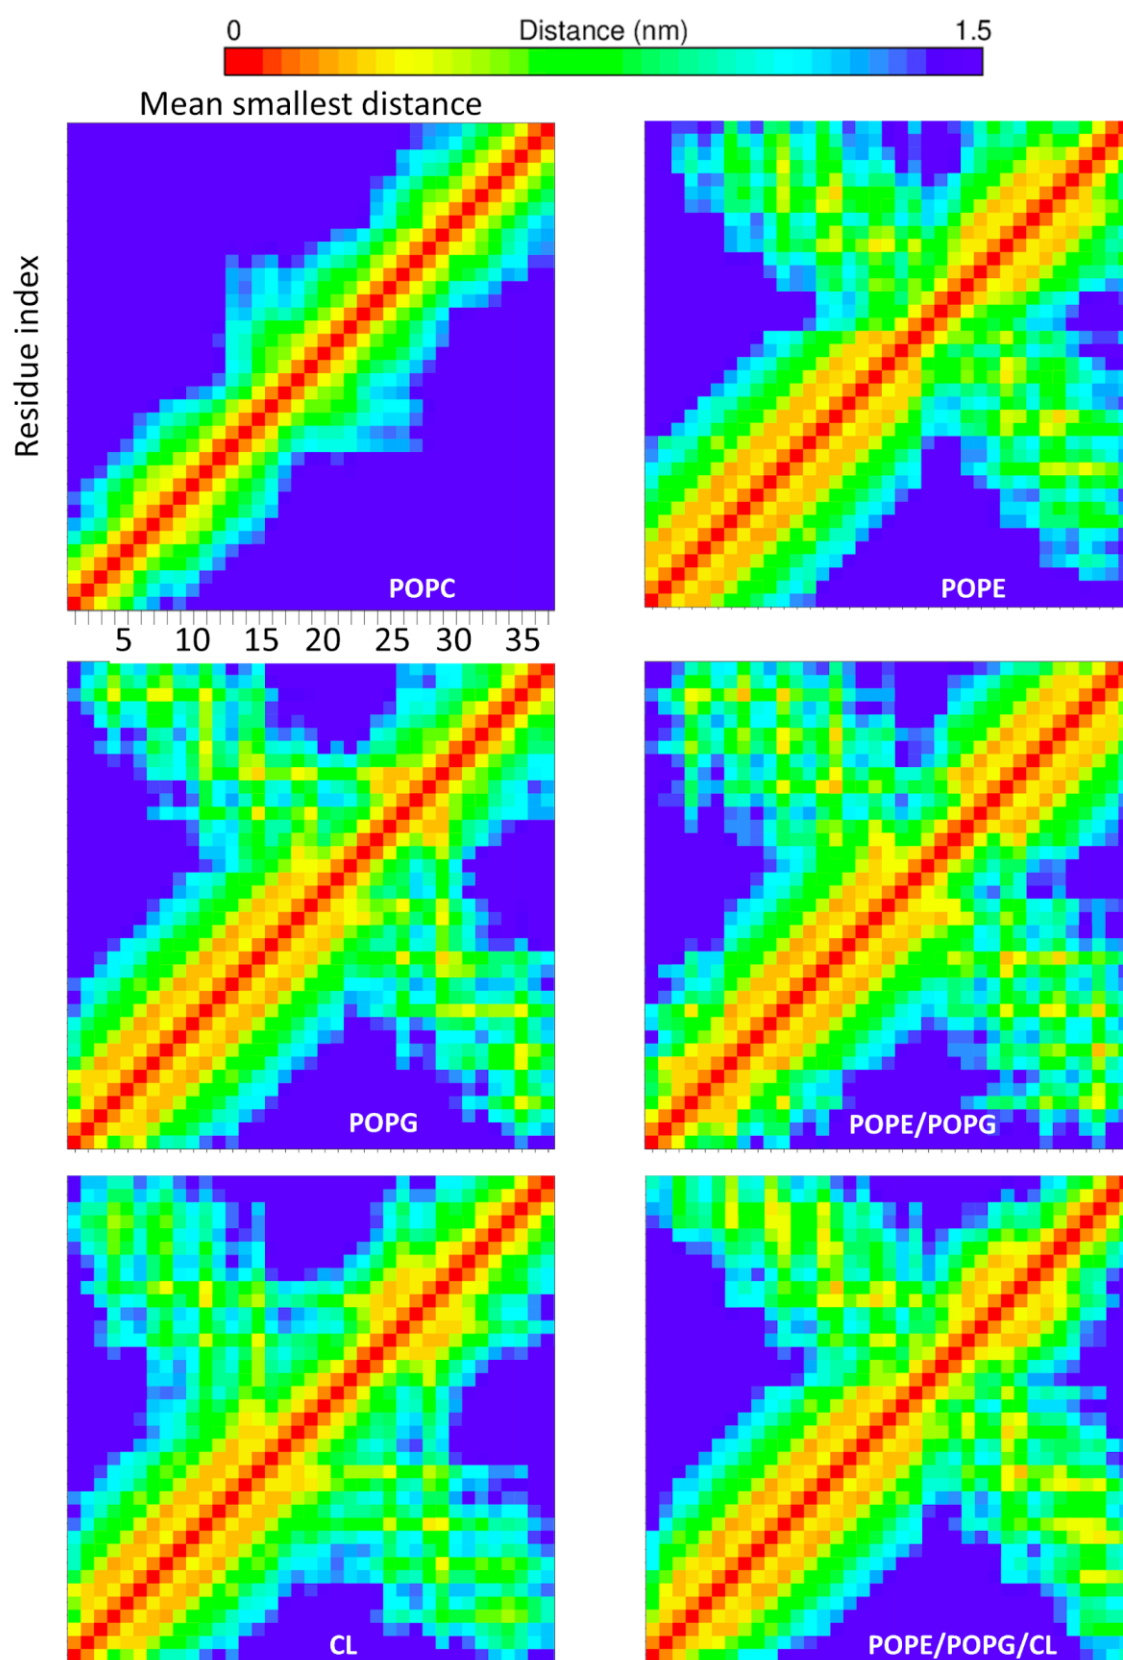

**Figure S1.** Contact maps comparing CXJ conformation with POPC and bacterial mimic membranes (POPE, POPG, POPE/POPG, CL and POPE/POPG/CL).

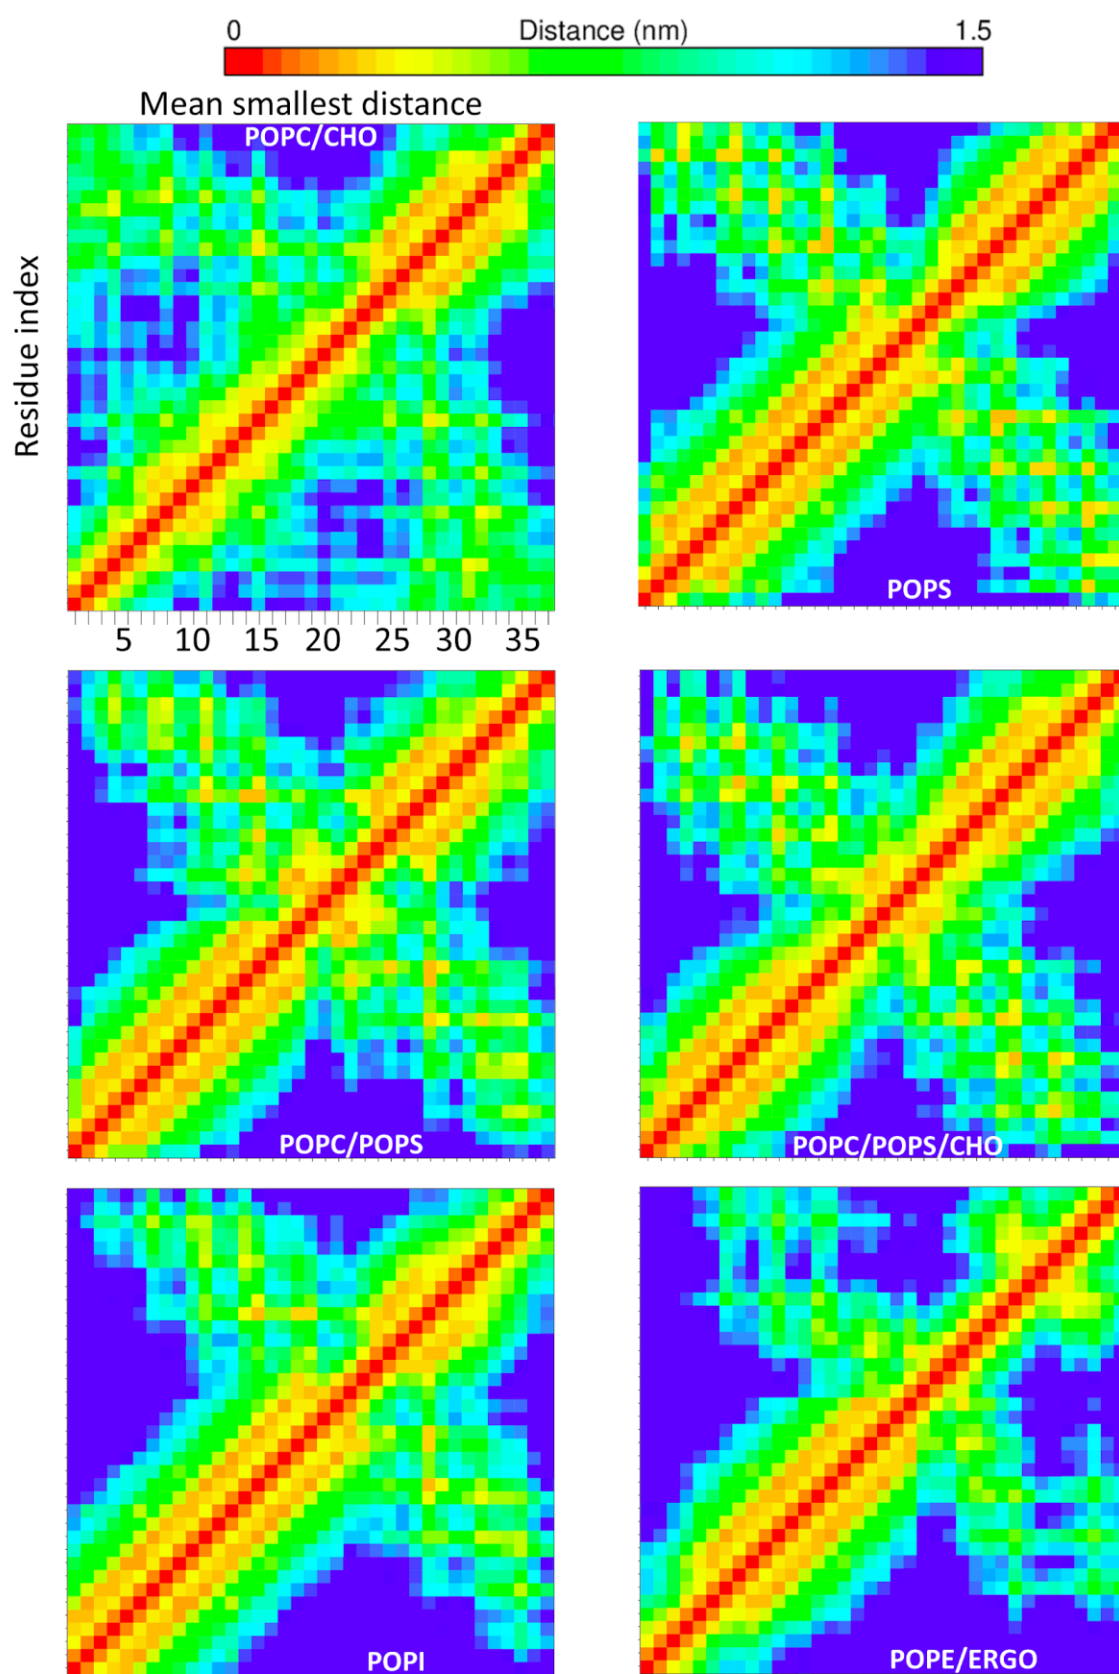

**Figure S2.** Contact maps comparing CXJ conformation with POPC/CHO, POPI, POPE/ERGO and POPS-containing membranes.

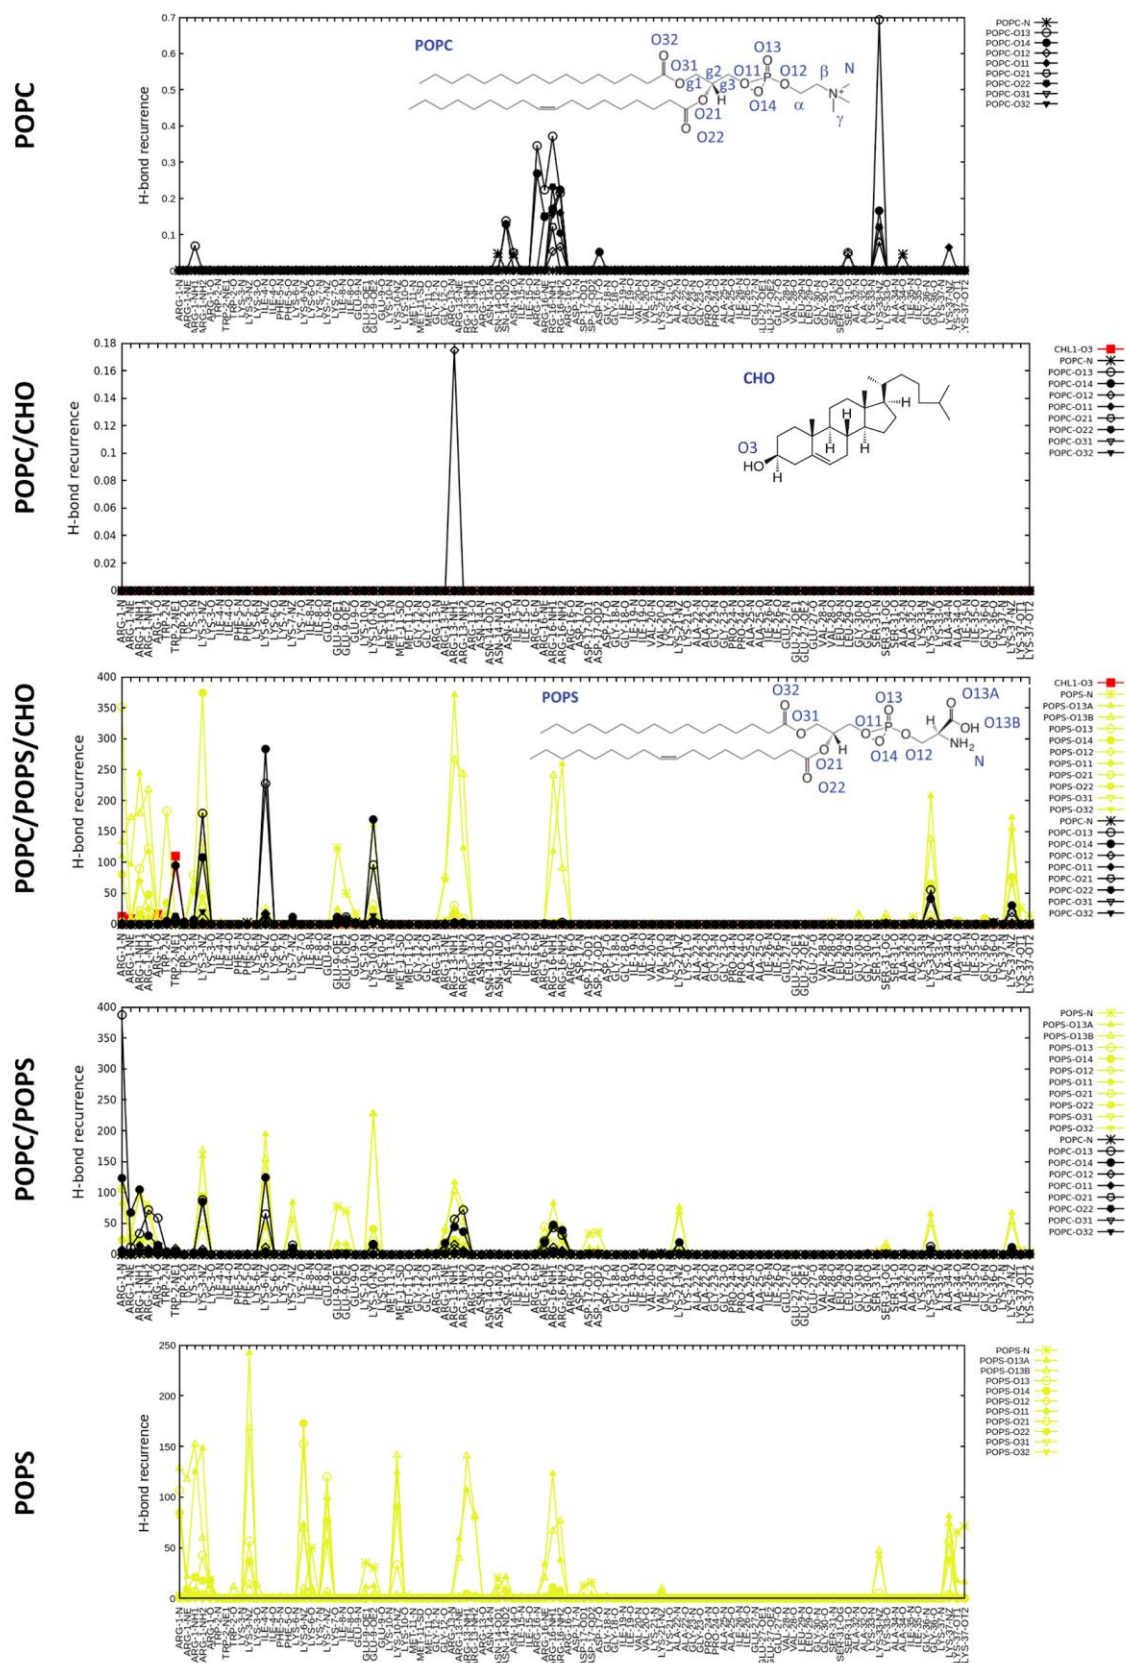

**Figure S3.** Occurrence of polar atom contacts (H-bonds and salt bridges) between CXJ peptide and various membrane bilayers calculated along MD simulation trajectories.

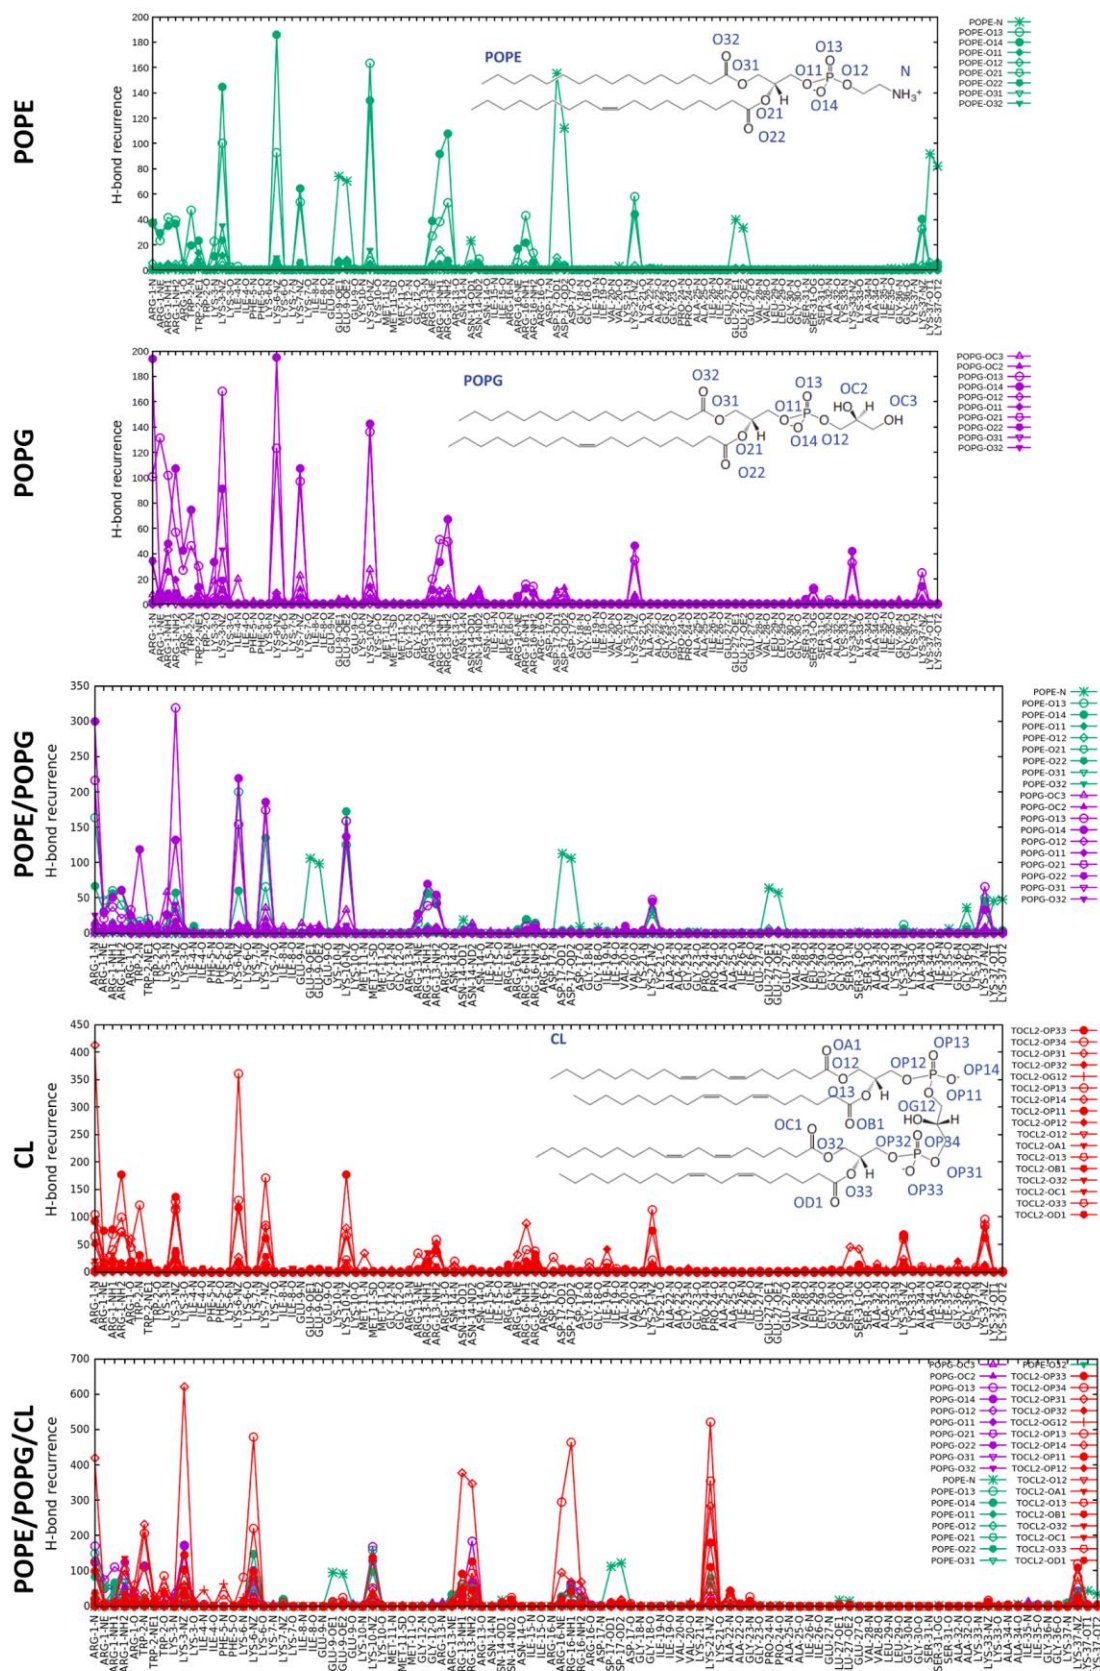

**Figure S4.** Occurrence of polar atom contacts (H-bonds and salt bridges) between CXJ peptide and various membrane bilayers calculated along MD simulation trajectories. TOCL2 refers to CL.



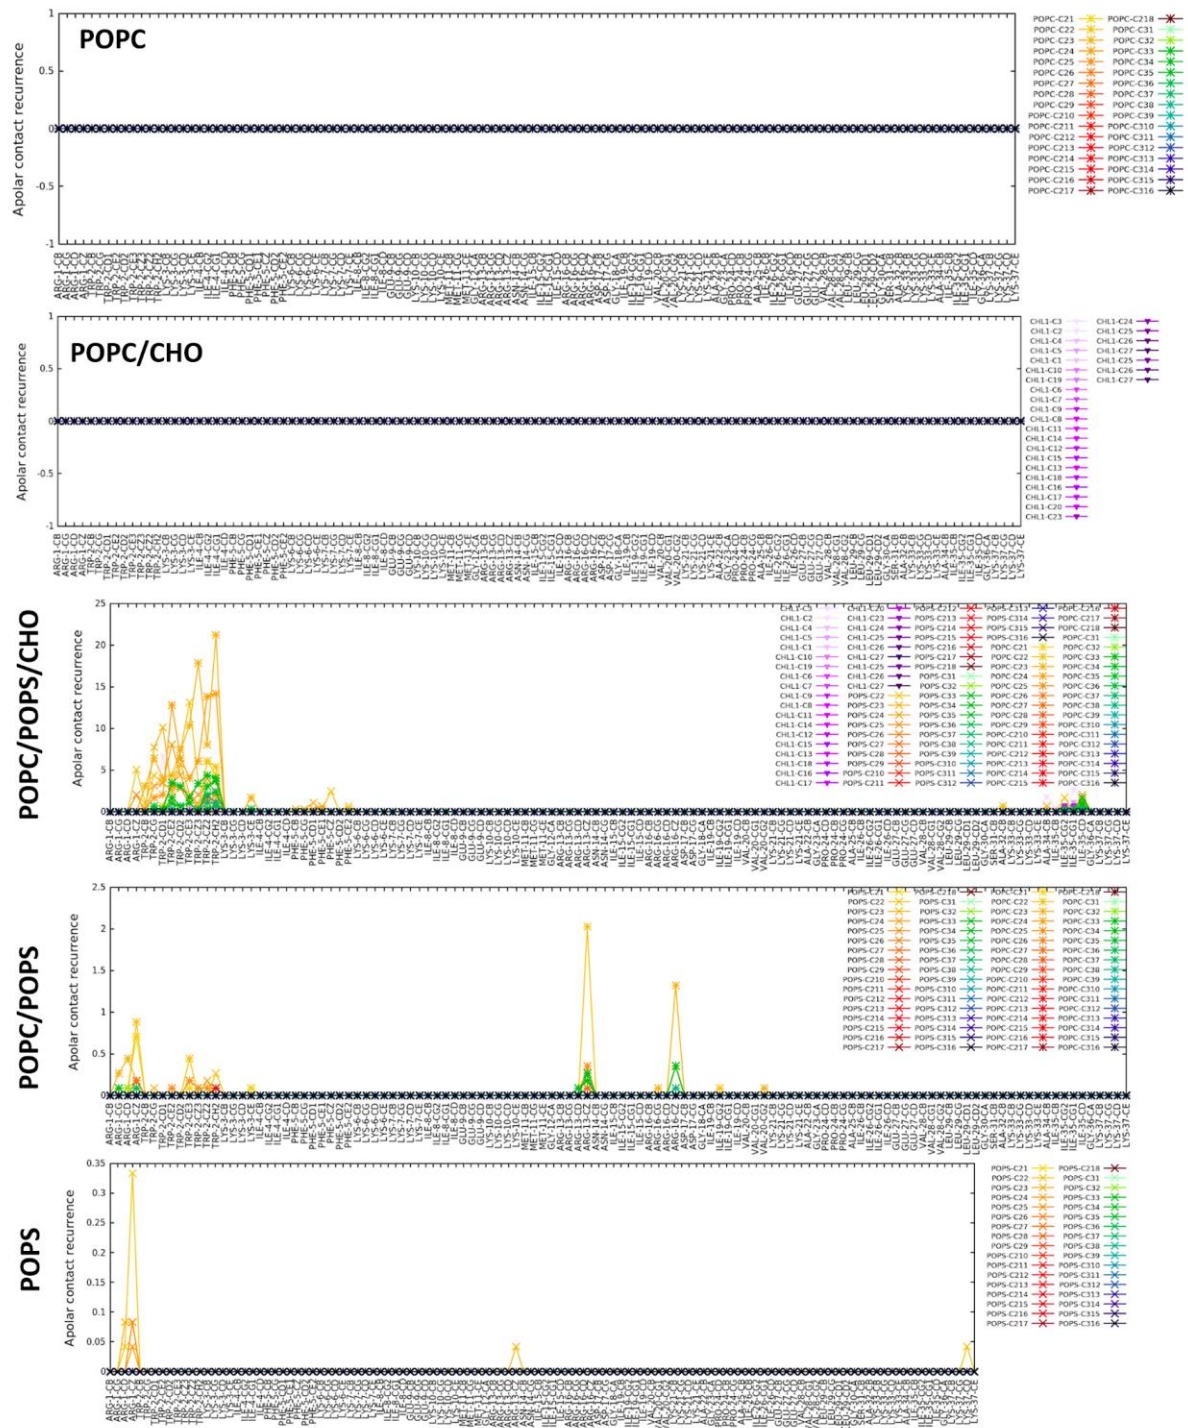

**Figure S5.** Occurrence of van der Waals contacts between CXJ peptide and various membrane bilayers calculated along MD simulation trajectories.





**POP1**

H-bond recurrence

POP1-02  
POP1-03  
POP1-04  
POP1-05  
POP1-06  
POP1-07  
POP1-08  
POP1-09  
POP1-10  
POP1-11  
POP1-12  
POP1-13  
POP1-14  
POP1-15  
POP1-16  
POP1-17  
POP1-18  
POP1-19  
POP1-20  
POP1-21  
POP1-22  
POP1-23  
POP1-24  
POP1-25  
POP1-26  
POP1-27  
POP1-28  
POP1-29  
POP1-30  
POP1-31  
POP1-32

**POPE/ERGO**

H-bond recurrence

ERG-03  
ERG-04  
ERG-05  
ERG-06  
ERG-07  
ERG-08  
ERG-09  
ERG-10  
ERG-11  
ERG-12  
ERG-13  
ERG-14  
ERG-15  
ERG-16  
ERG-17  
ERG-18  
ERG-19  
ERG-20  
ERG-21  
ERG-22  
ERG-23  
ERG-24  
ERG-25  
ERG-26  
ERG-27  
ERG-28  
ERG-29  
ERG-30  
ERG-31  
ERG-32

**POP1**

Apolar contacts

POP1-02  
POP1-03  
POP1-04  
POP1-05  
POP1-06  
POP1-07  
POP1-08  
POP1-09  
POP1-10  
POP1-11  
POP1-12  
POP1-13  
POP1-14  
POP1-15  
POP1-16  
POP1-17  
POP1-18  
POP1-19  
POP1-20  
POP1-21  
POP1-22  
POP1-23  
POP1-24  
POP1-25  
POP1-26  
POP1-27  
POP1-28  
POP1-29  
POP1-30  
POP1-31  
POP1-32

**POPE/ERGO**

Apolar contact recurrence

ERG-03  
ERG-04  
ERG-05  
ERG-06  
ERG-07  
ERG-08  
ERG-09  
ERG-10  
ERG-11  
ERG-12  
ERG-13  
ERG-14  
ERG-15  
ERG-16  
ERG-17  
ERG-18  
ERG-19  
ERG-20  
ERG-21  
ERG-22  
ERG-23  
ERG-24  
ERG-25  
ERG-26  
ERG-27  
ERG-28  
ERG-29  
ERG-30  
ERG-31  
ERG-32

**Figure S7.** Occurrence of polar and apolar contacts with fungal-like membranes containing POPI and POPE/ERGO.



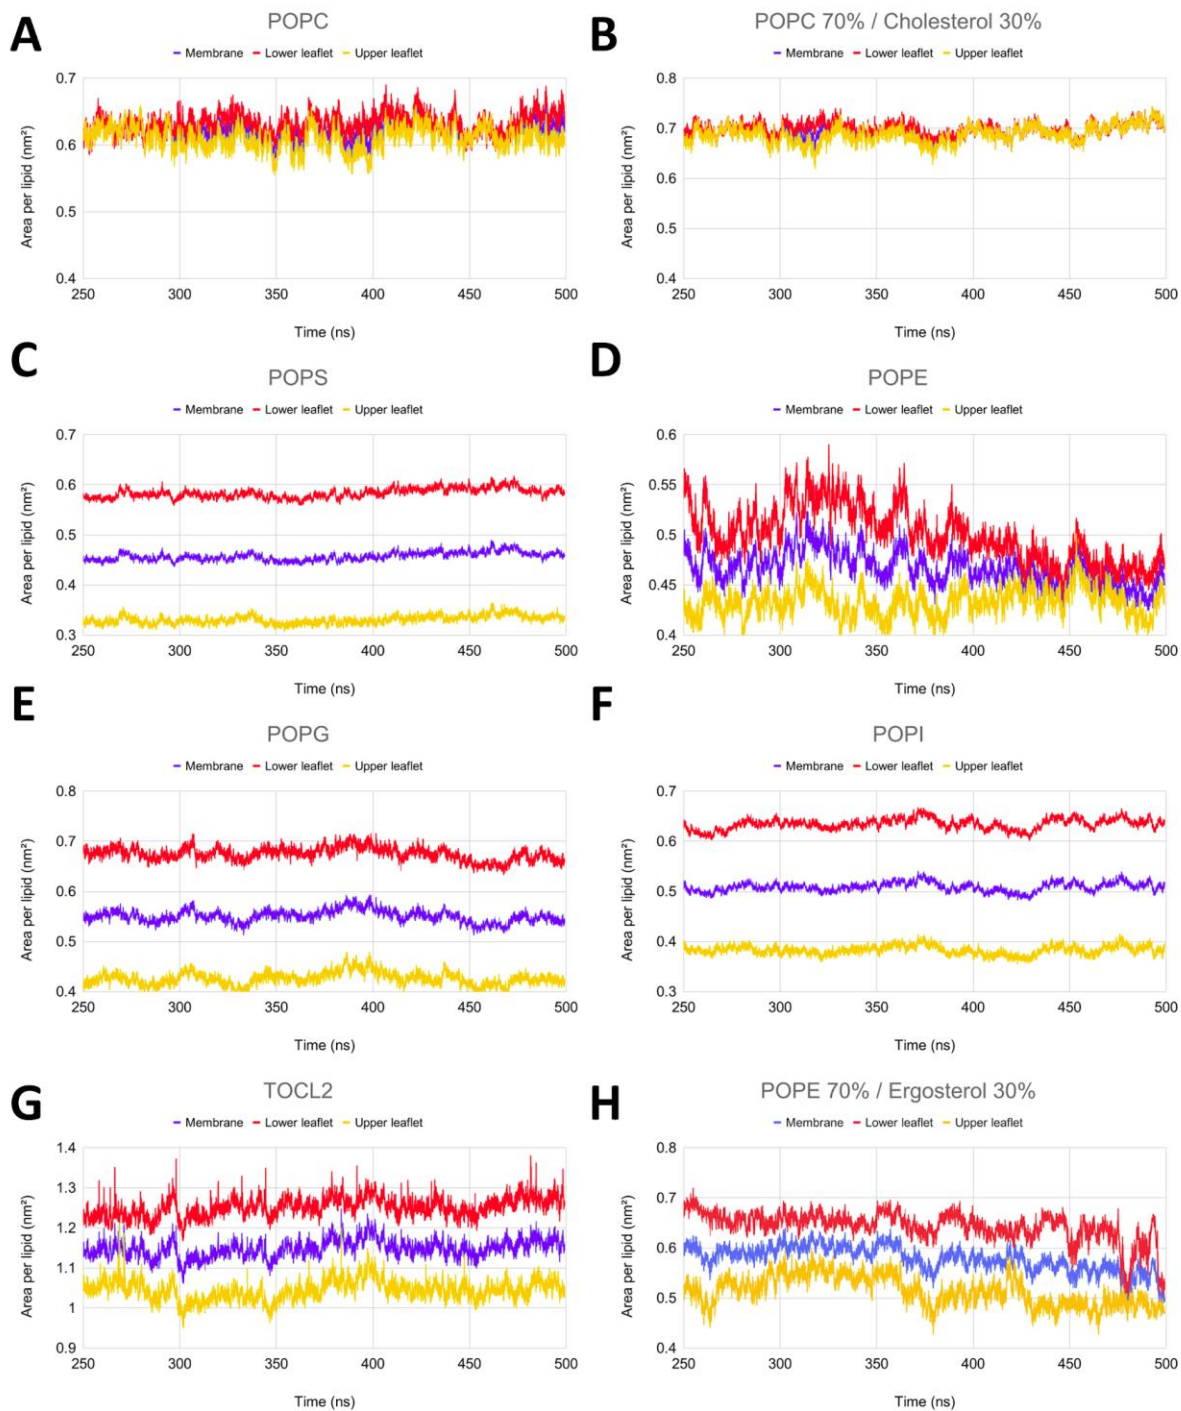

**Figure S8.** Area per lipid (nm<sup>2</sup>) in bilayers containing various phospholipids compositions as calculated from MD simulations in the presence of eight CXJ peptides. The average value is shown in blue while the upper and lower leaflet are shown in yellow and red respectively. TOCL2 refers to CL.

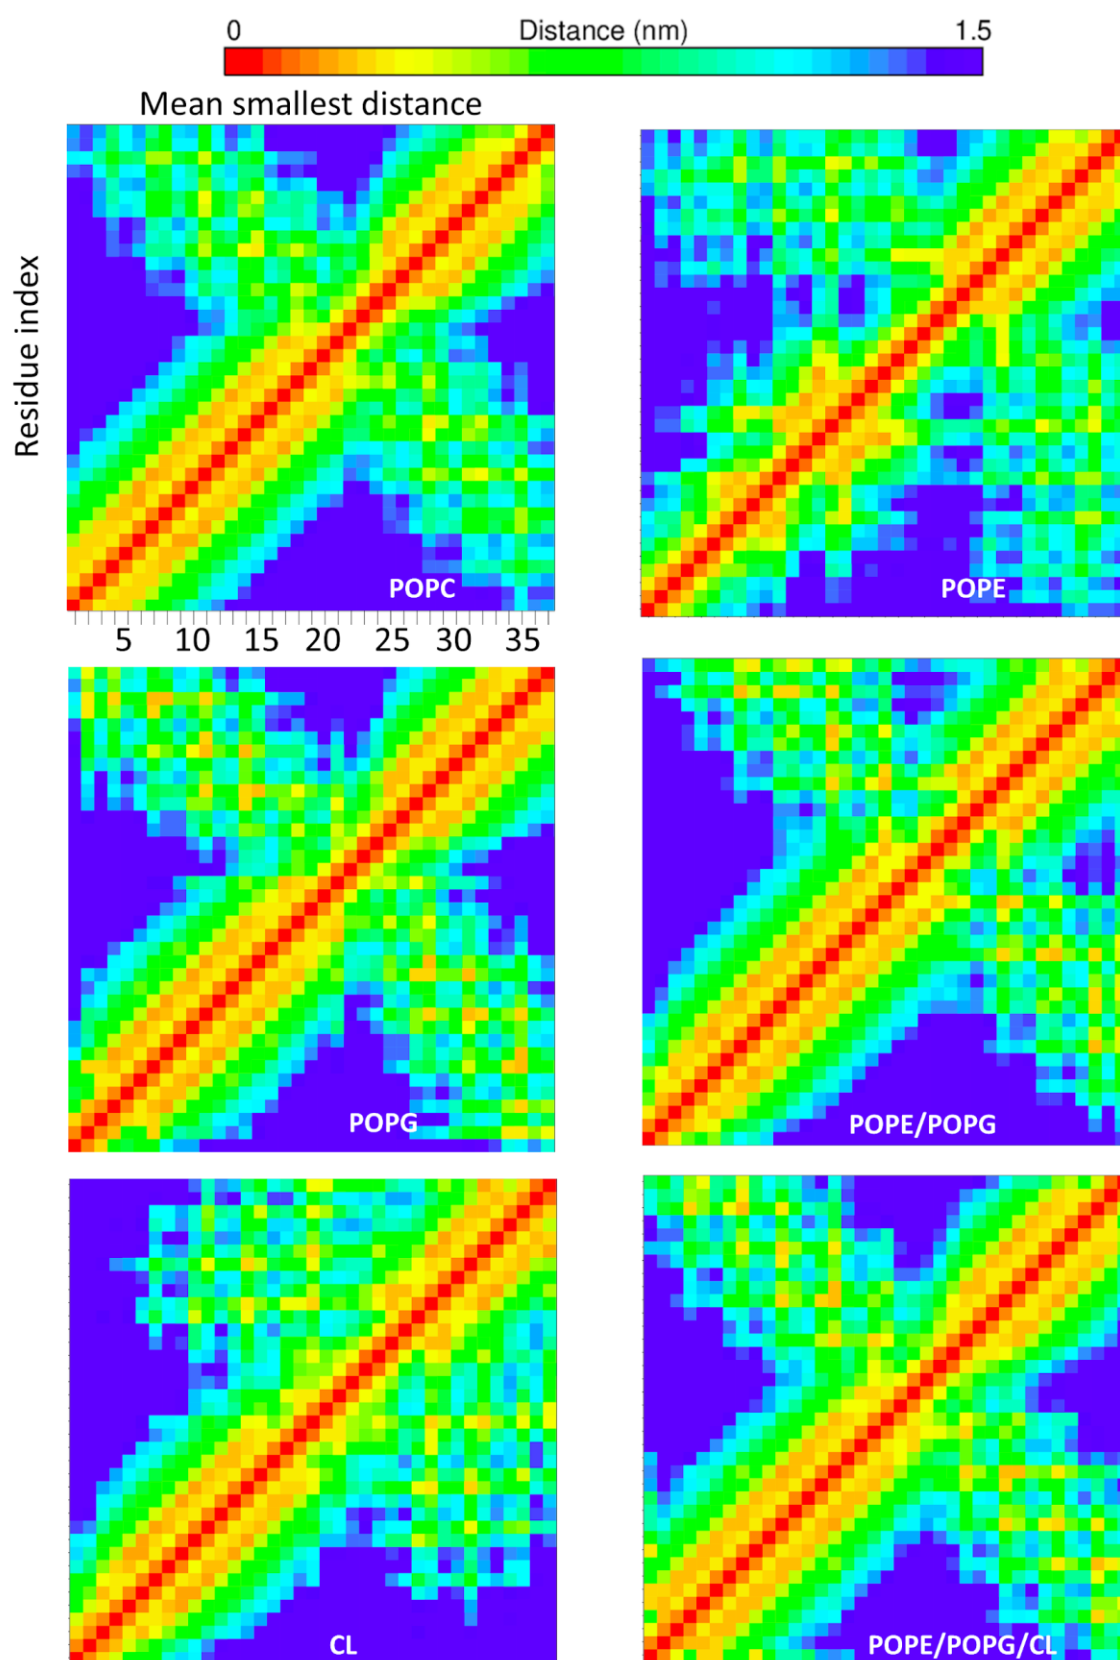

**Figure S9.** Contact maps comparing CXJN conformation with POPC/CHO, POPI, POPE/ERGO and POPS-containing membranes. TOCL2 refers to CL.

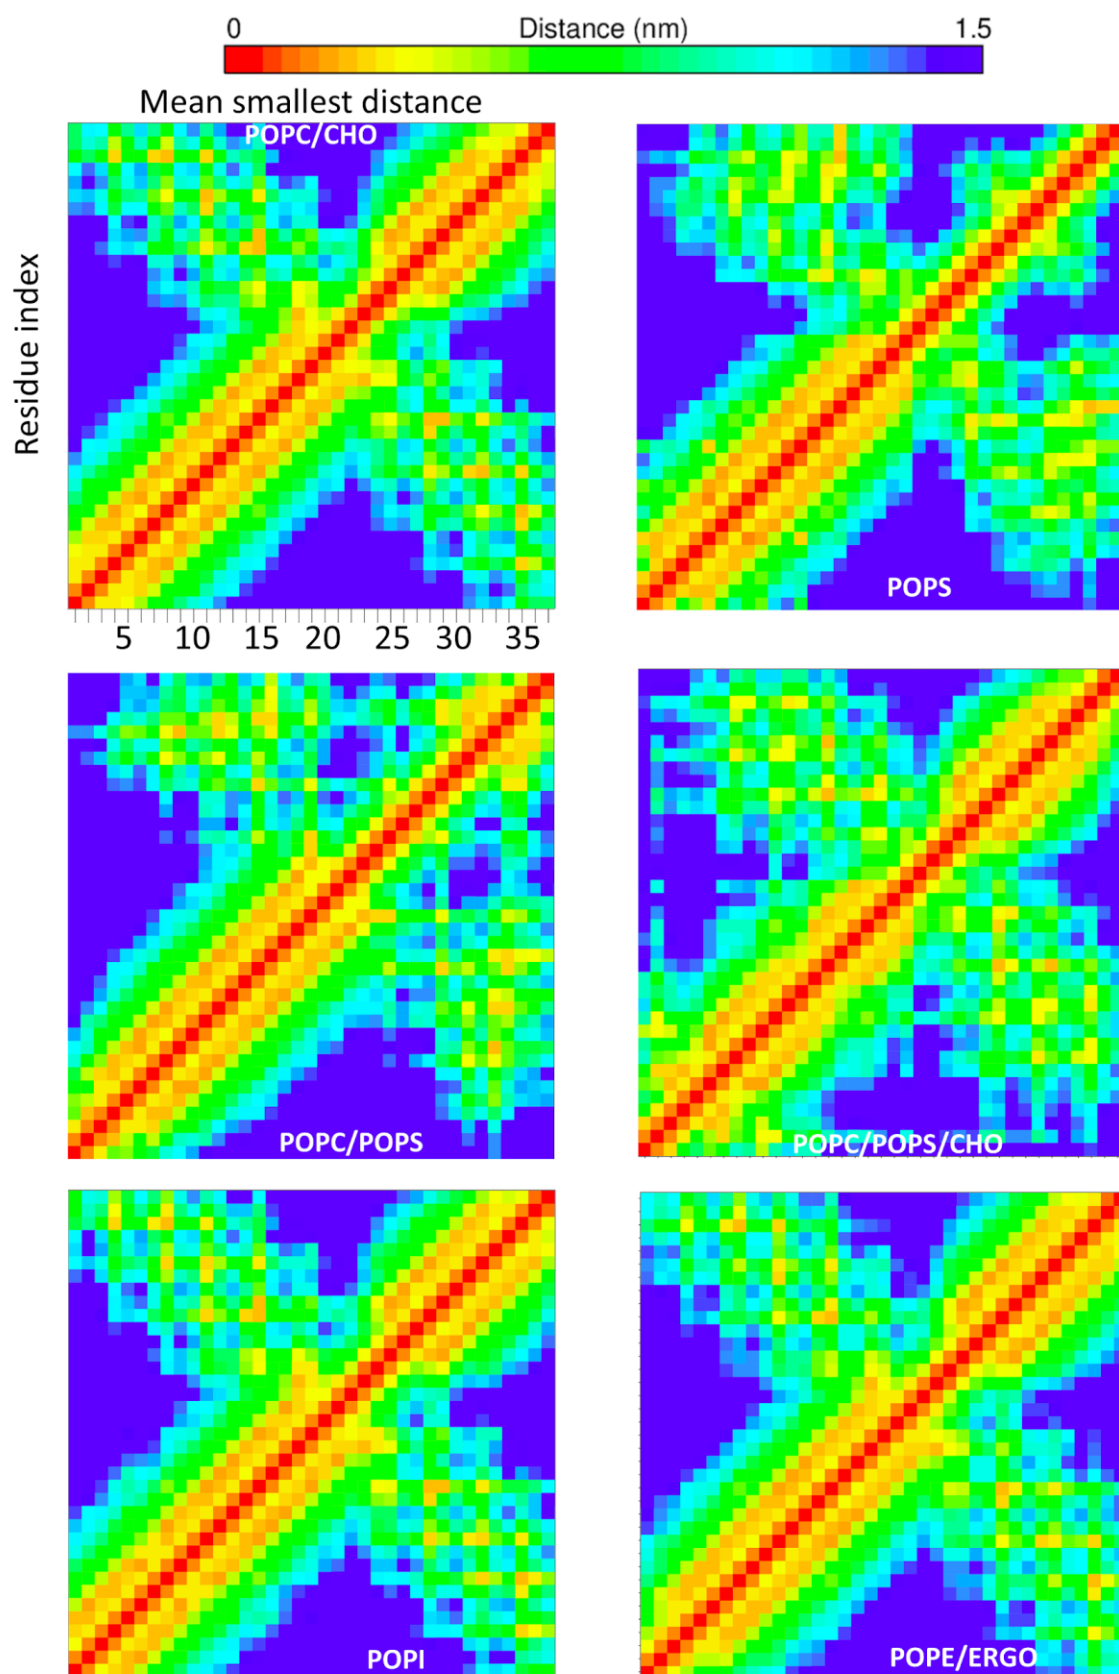

**Figure S10.** Contact maps comparing CXJN conformation with POPC/CHO, POPI, POPE/ERGO and POPS-containing membranes. TOCL2 refers to CL.







## Polar contacts

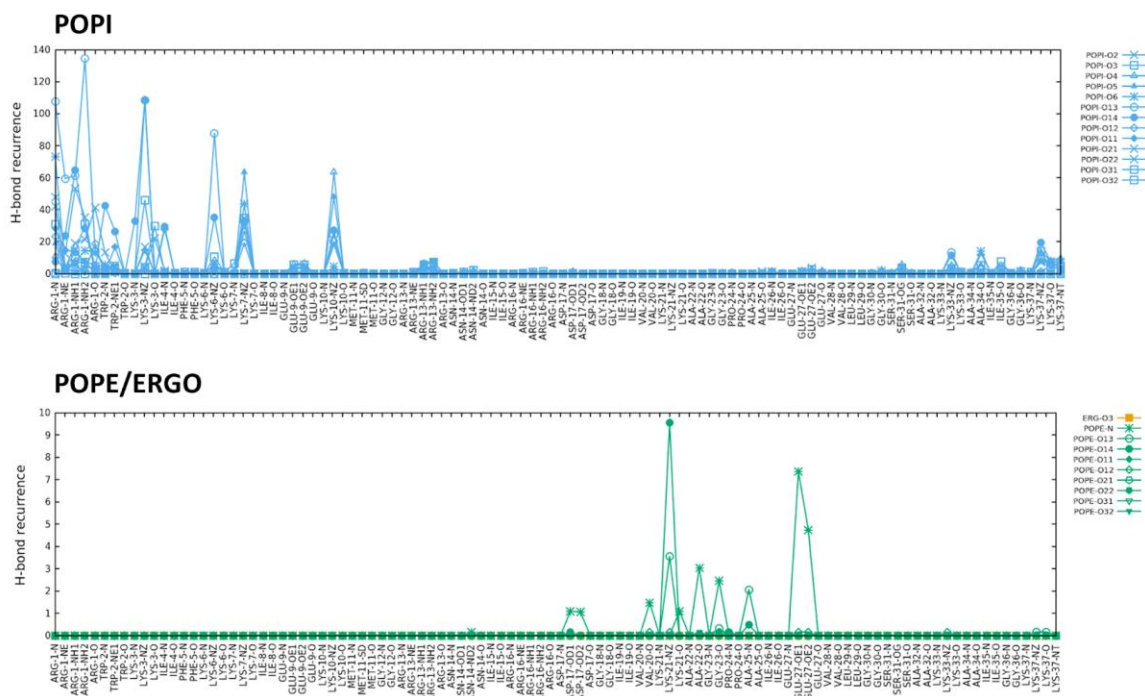

## Apolar contacts

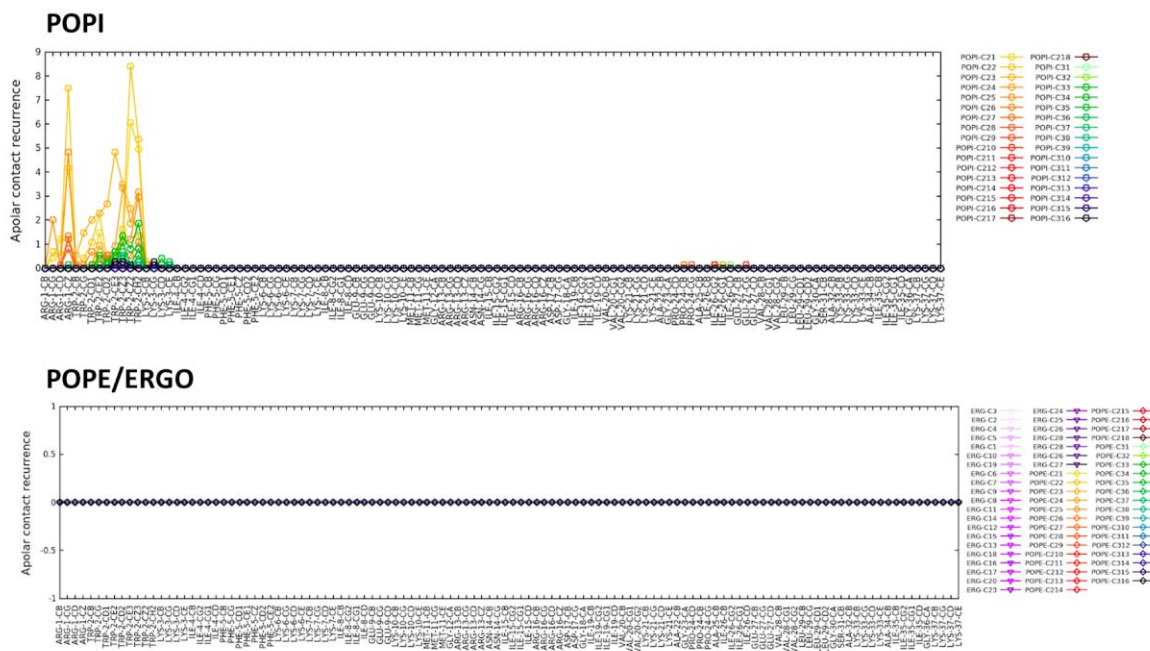

**Figure S13.** Occurrence of polar and apolar contacts between CXJN peptide and fungal-like membranes containing POPI and POPE/ERGO.









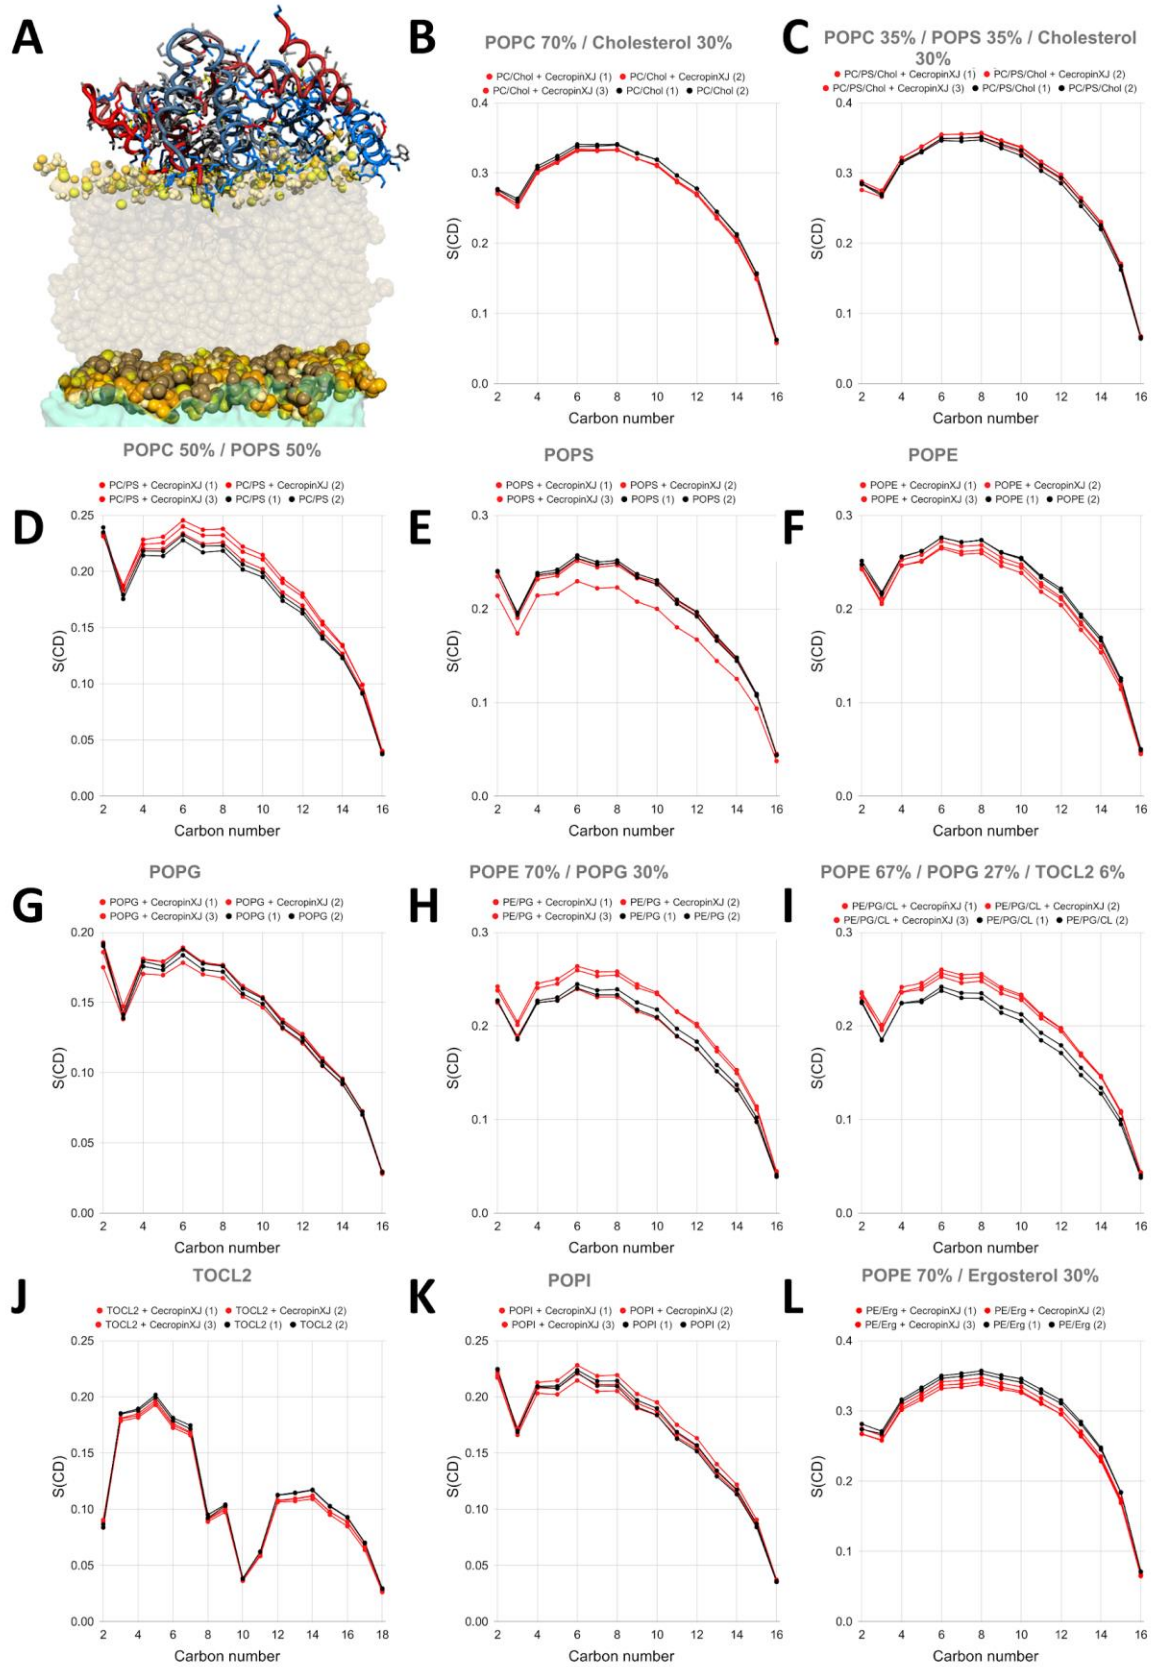

**Figure S16.** Order parameter of C-H moieties of palmitoyl side chains in membranes containing various phospholipids compositions as calculated from multiple repetitions of MD simulations in the absence (2 repetitions in black labeled as 1 and 2) and in the presence (3 repetitions in red labeled from 1 to 3) of eight CXJN peptides. The panel in the top left corner is an example of MD snapshot with POPS bilayer (color code in the caption of Figure 3). TOCL2 refers to CL.
